# Supplementary material for: A surface-imprinting lanthanide fluorescent hybrid probe on the SiO2 microspheres for the detection of the enrofloxacin
Source: Research Square preprint supplement (doi:10.21203/rs.3.rs-6545537/v1), 2025-05-07
Supplement: Supplementary file 1 [file cf003ce79f3f6758ed62fe41.docx]

**Supporting information**

A surface-imprinting lanthanide fluorescent hybrid probe on the SiO2 microspheres for the detection of the enrofloxacin

Xiao-Qing Huang1,†，Mao-Yu Wang1,†, Xiao-Chen Wang2,†, Xin Shi1, Rui-Wen Li1, Shuang Wu1 and Ying Li1, *

1 School of Materials and Chemistry, University of Shanghai for Science and Technology, Shanghai 200093, P. R. China

2 Shandong Center for Food and Drug Evaluation&Inspection, Shandong 250014, P. R. China

† These two authors contributed equally to this work

* Correspondence: liying@usst.edu.cn. (Y.L)


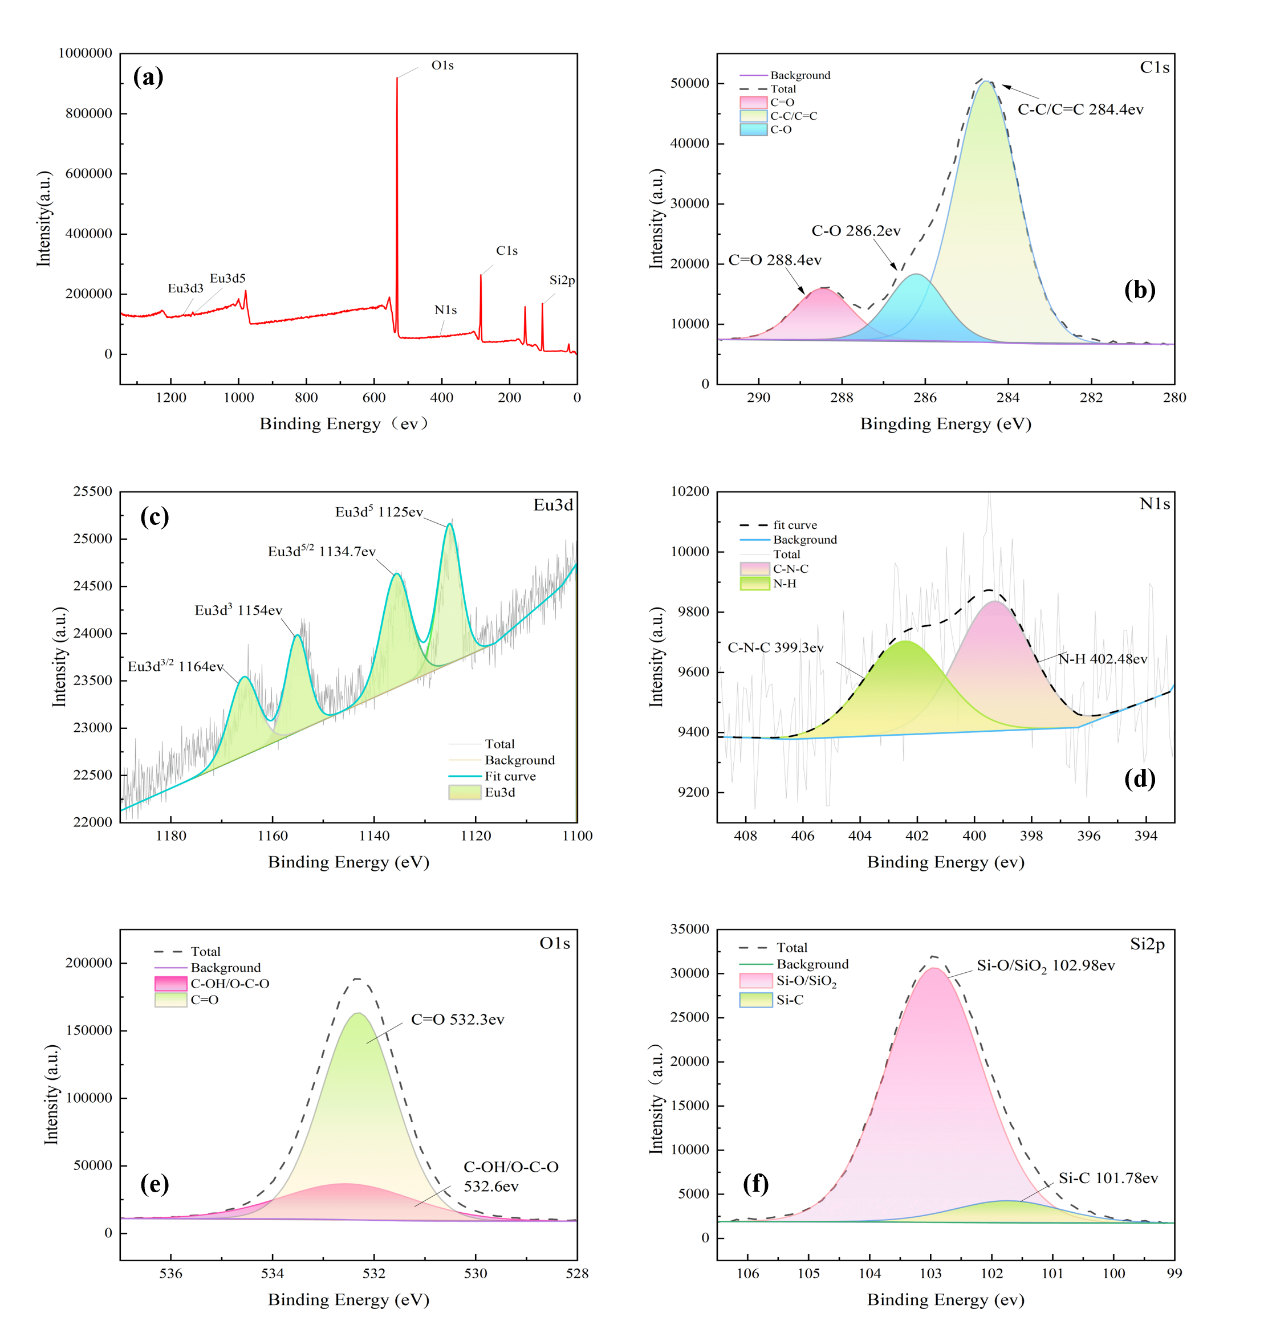


**Fig S1.** XPS wide-scan high-resolution full spectrum of SiO2@Eu(DBM)3Phen/SMIP (a); XPS narrow-scan maps of C1s (b), Eu3d (c), N1s (d), O1s (e) and Si2p (f)


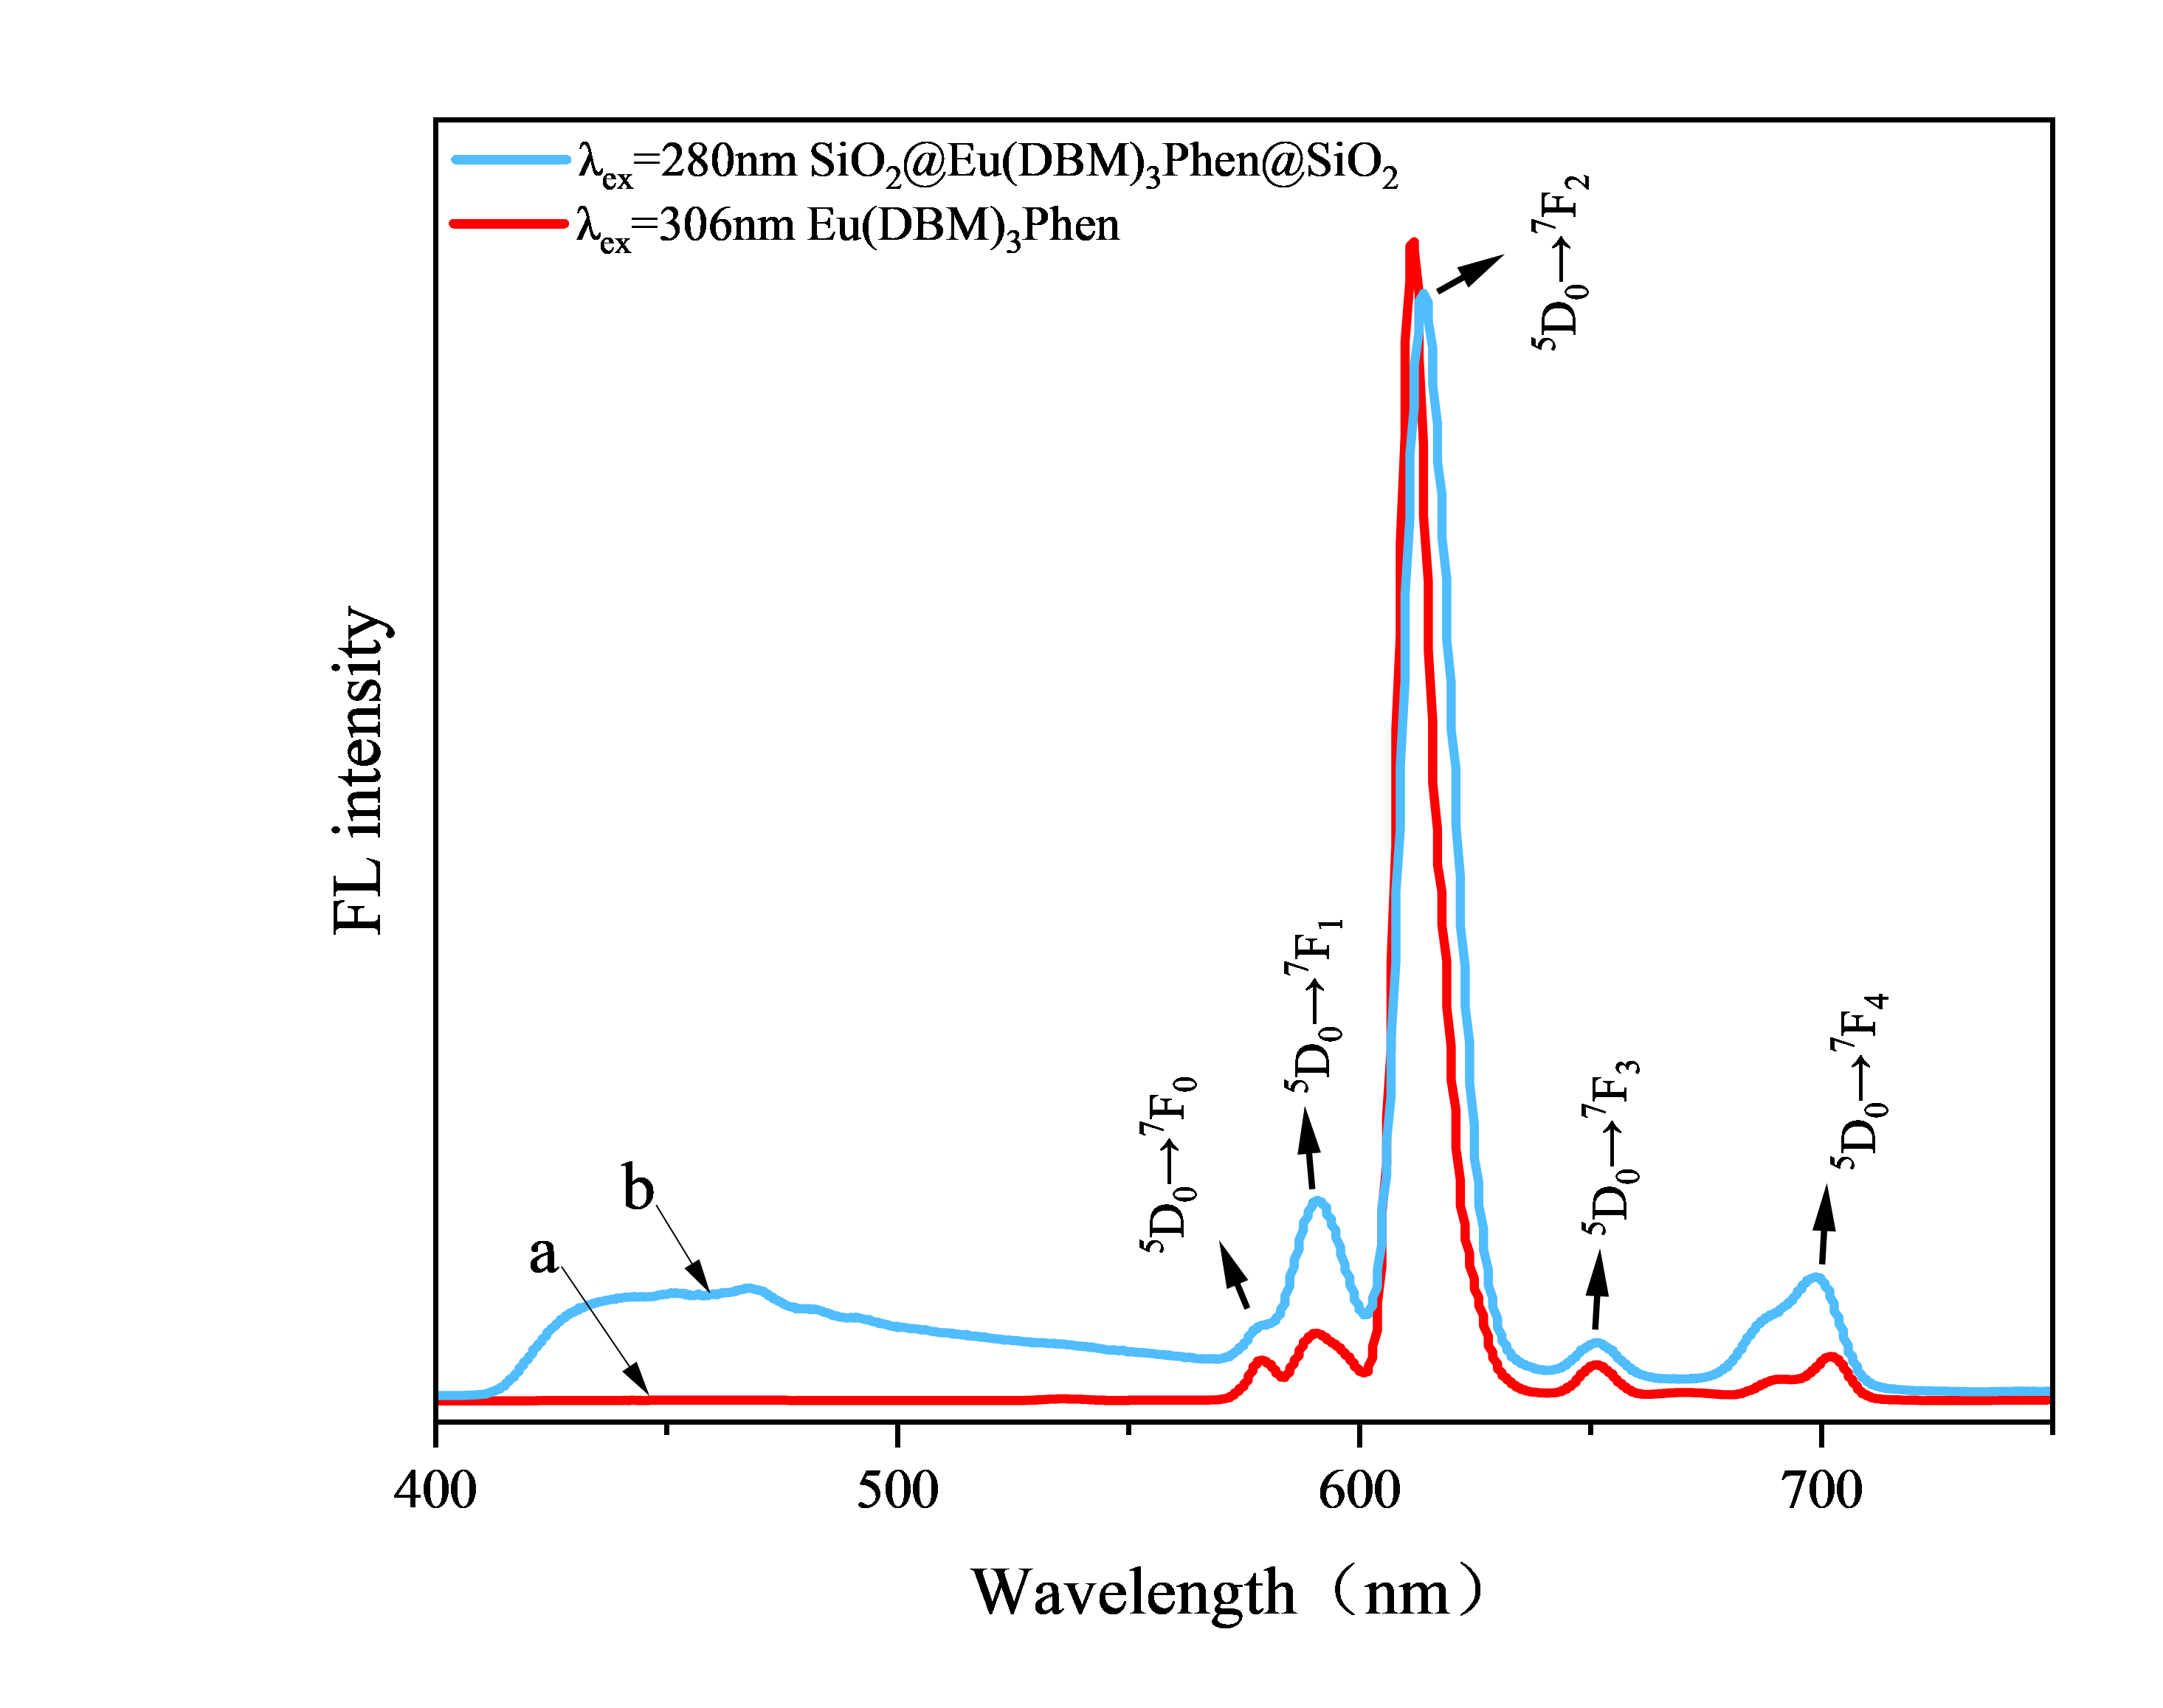


**Fig S2.** (a) Emission spectra of pure Eu(DBM)3Phen complexes (a) and SiO2@Eu(DBM)3Phen(b)


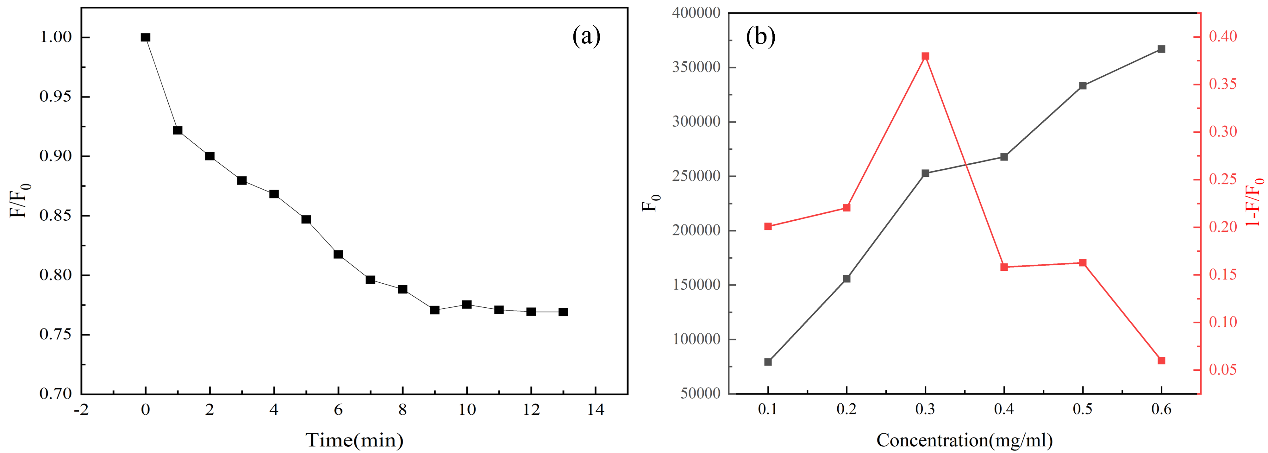


**Fig S3.** Effect of incubation time (a) and concentration (b) on the fluorescence burst value (F/F0) of SiO2@Eu(DBM)3Phen/SMIP


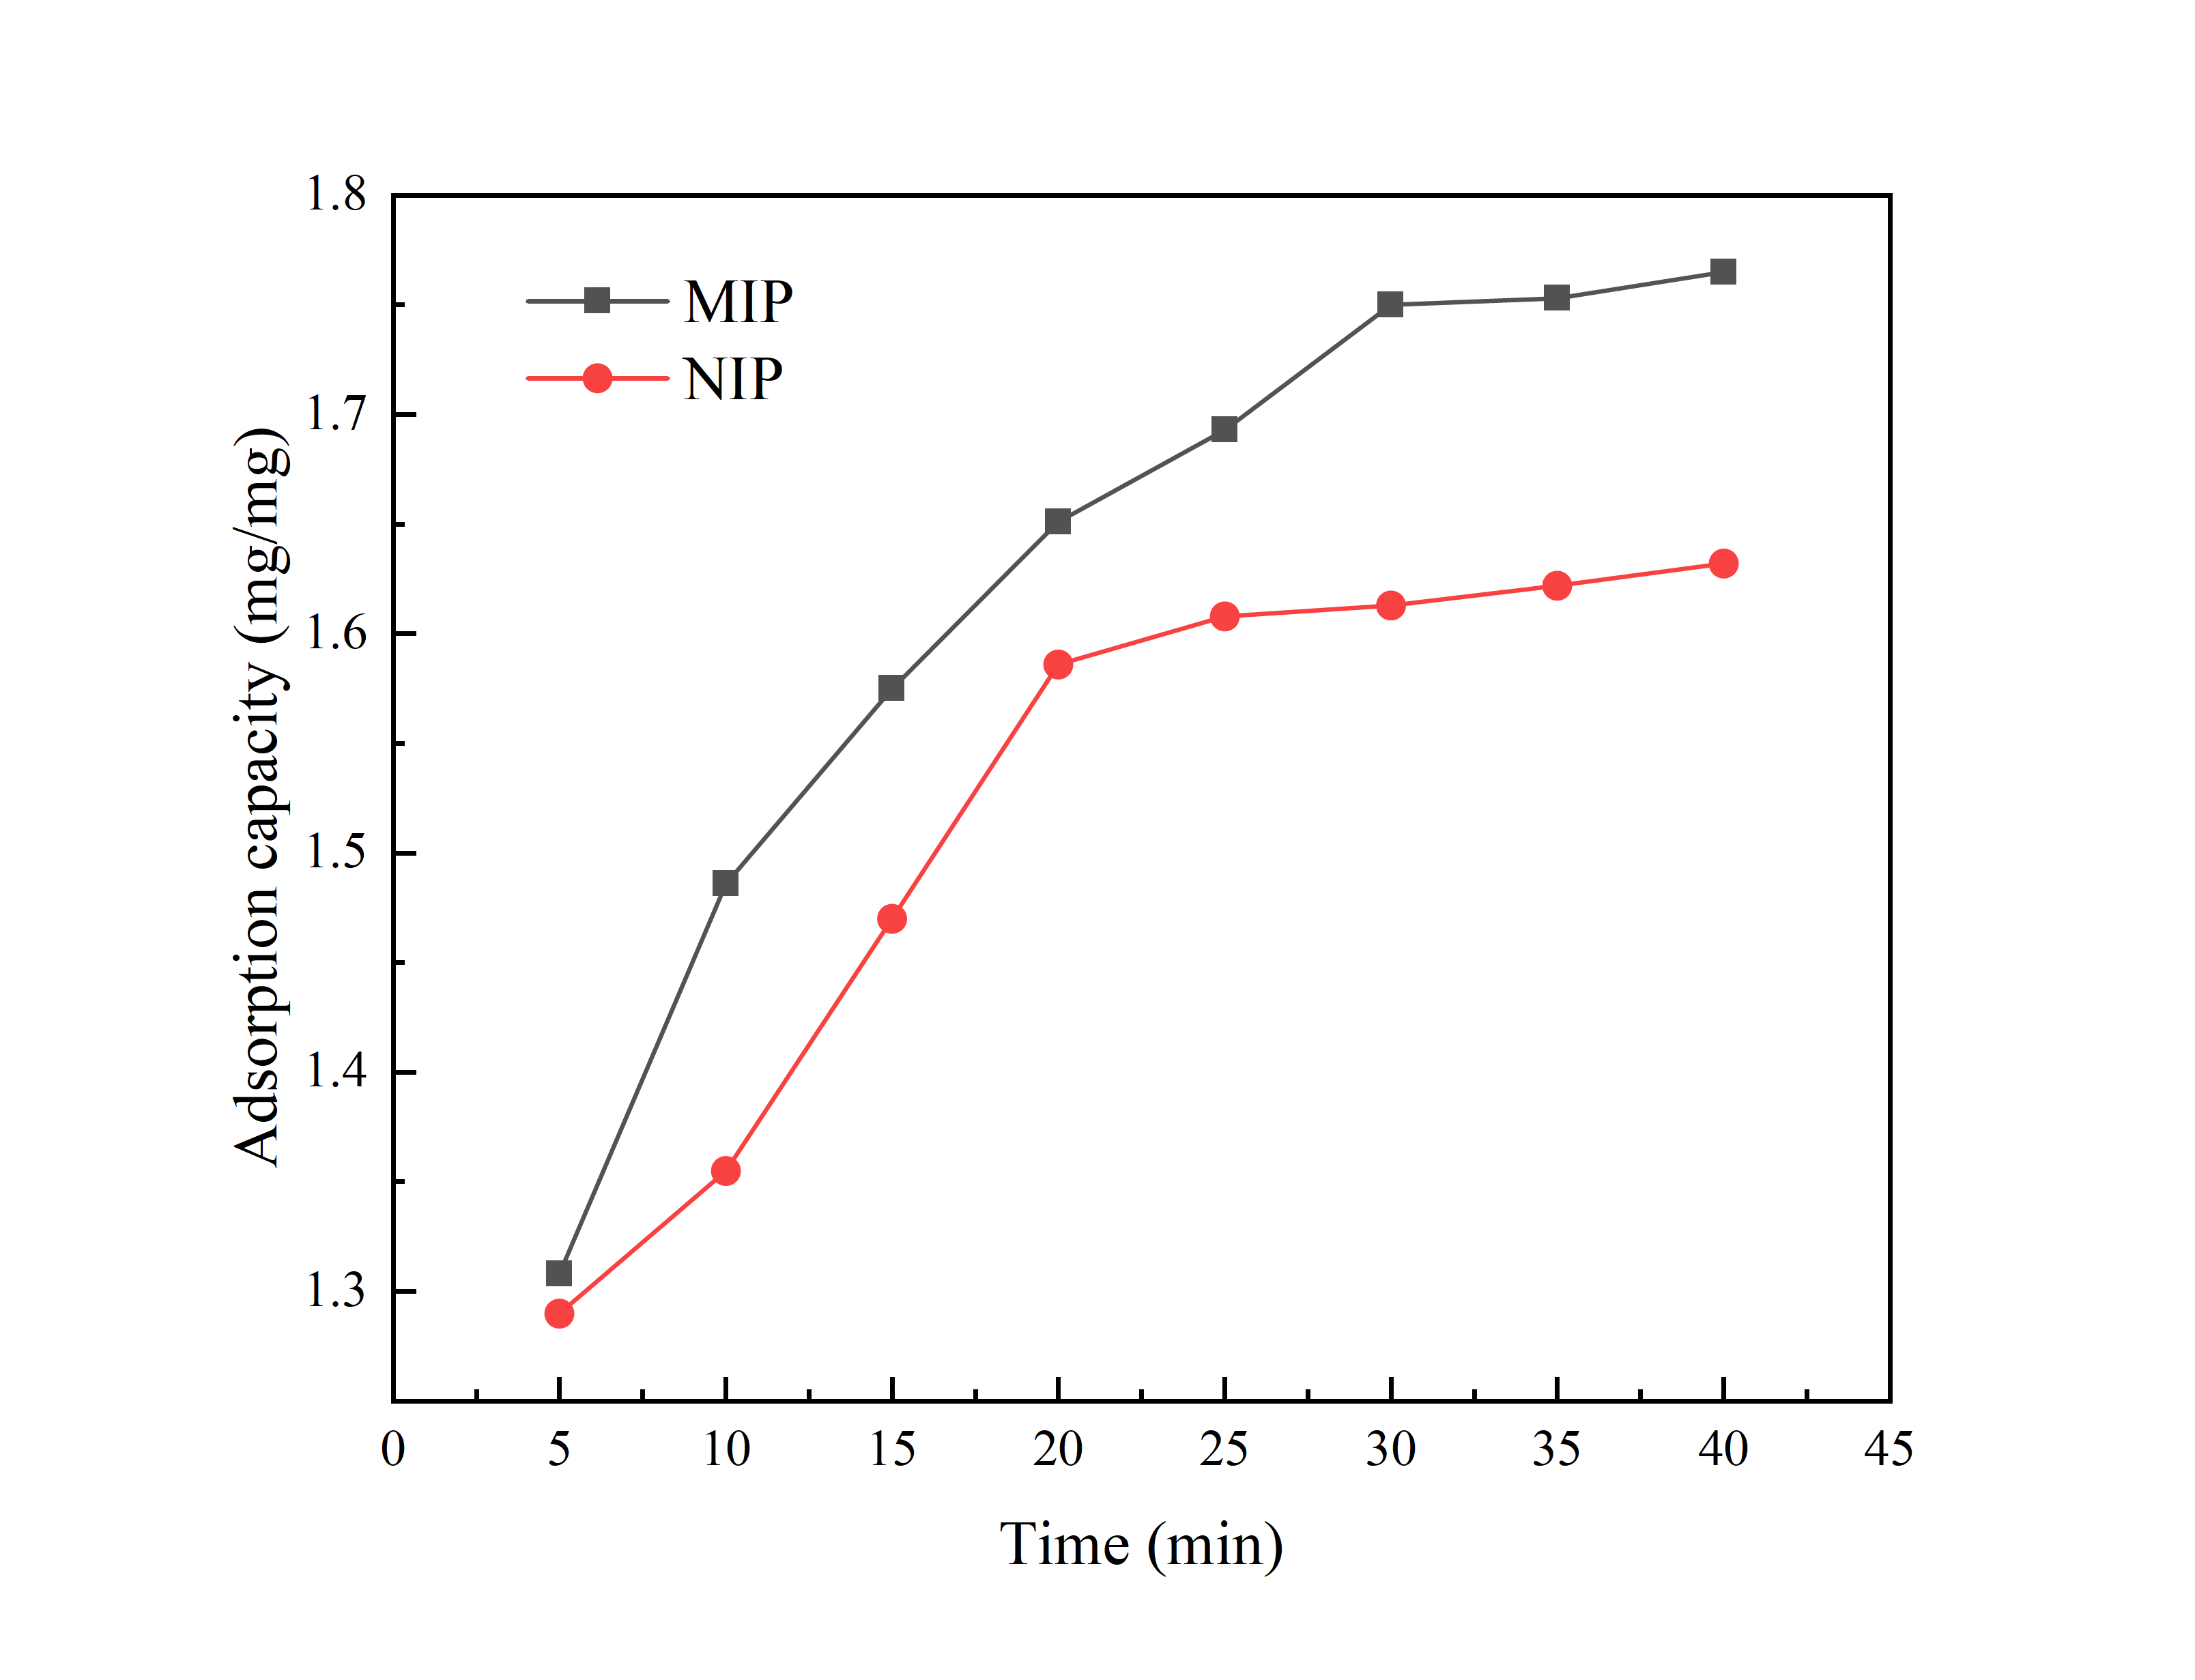


**Fig S4.** MIP and NIP dynamic adsorption curves of 0.3 mg/ml SiO2@Eu(DBM)3Phen/SNIP/SMIP incubated with an initial concentration of 100 mg/ml enrofloxacin at 500 rpm stirring speed for 30 min


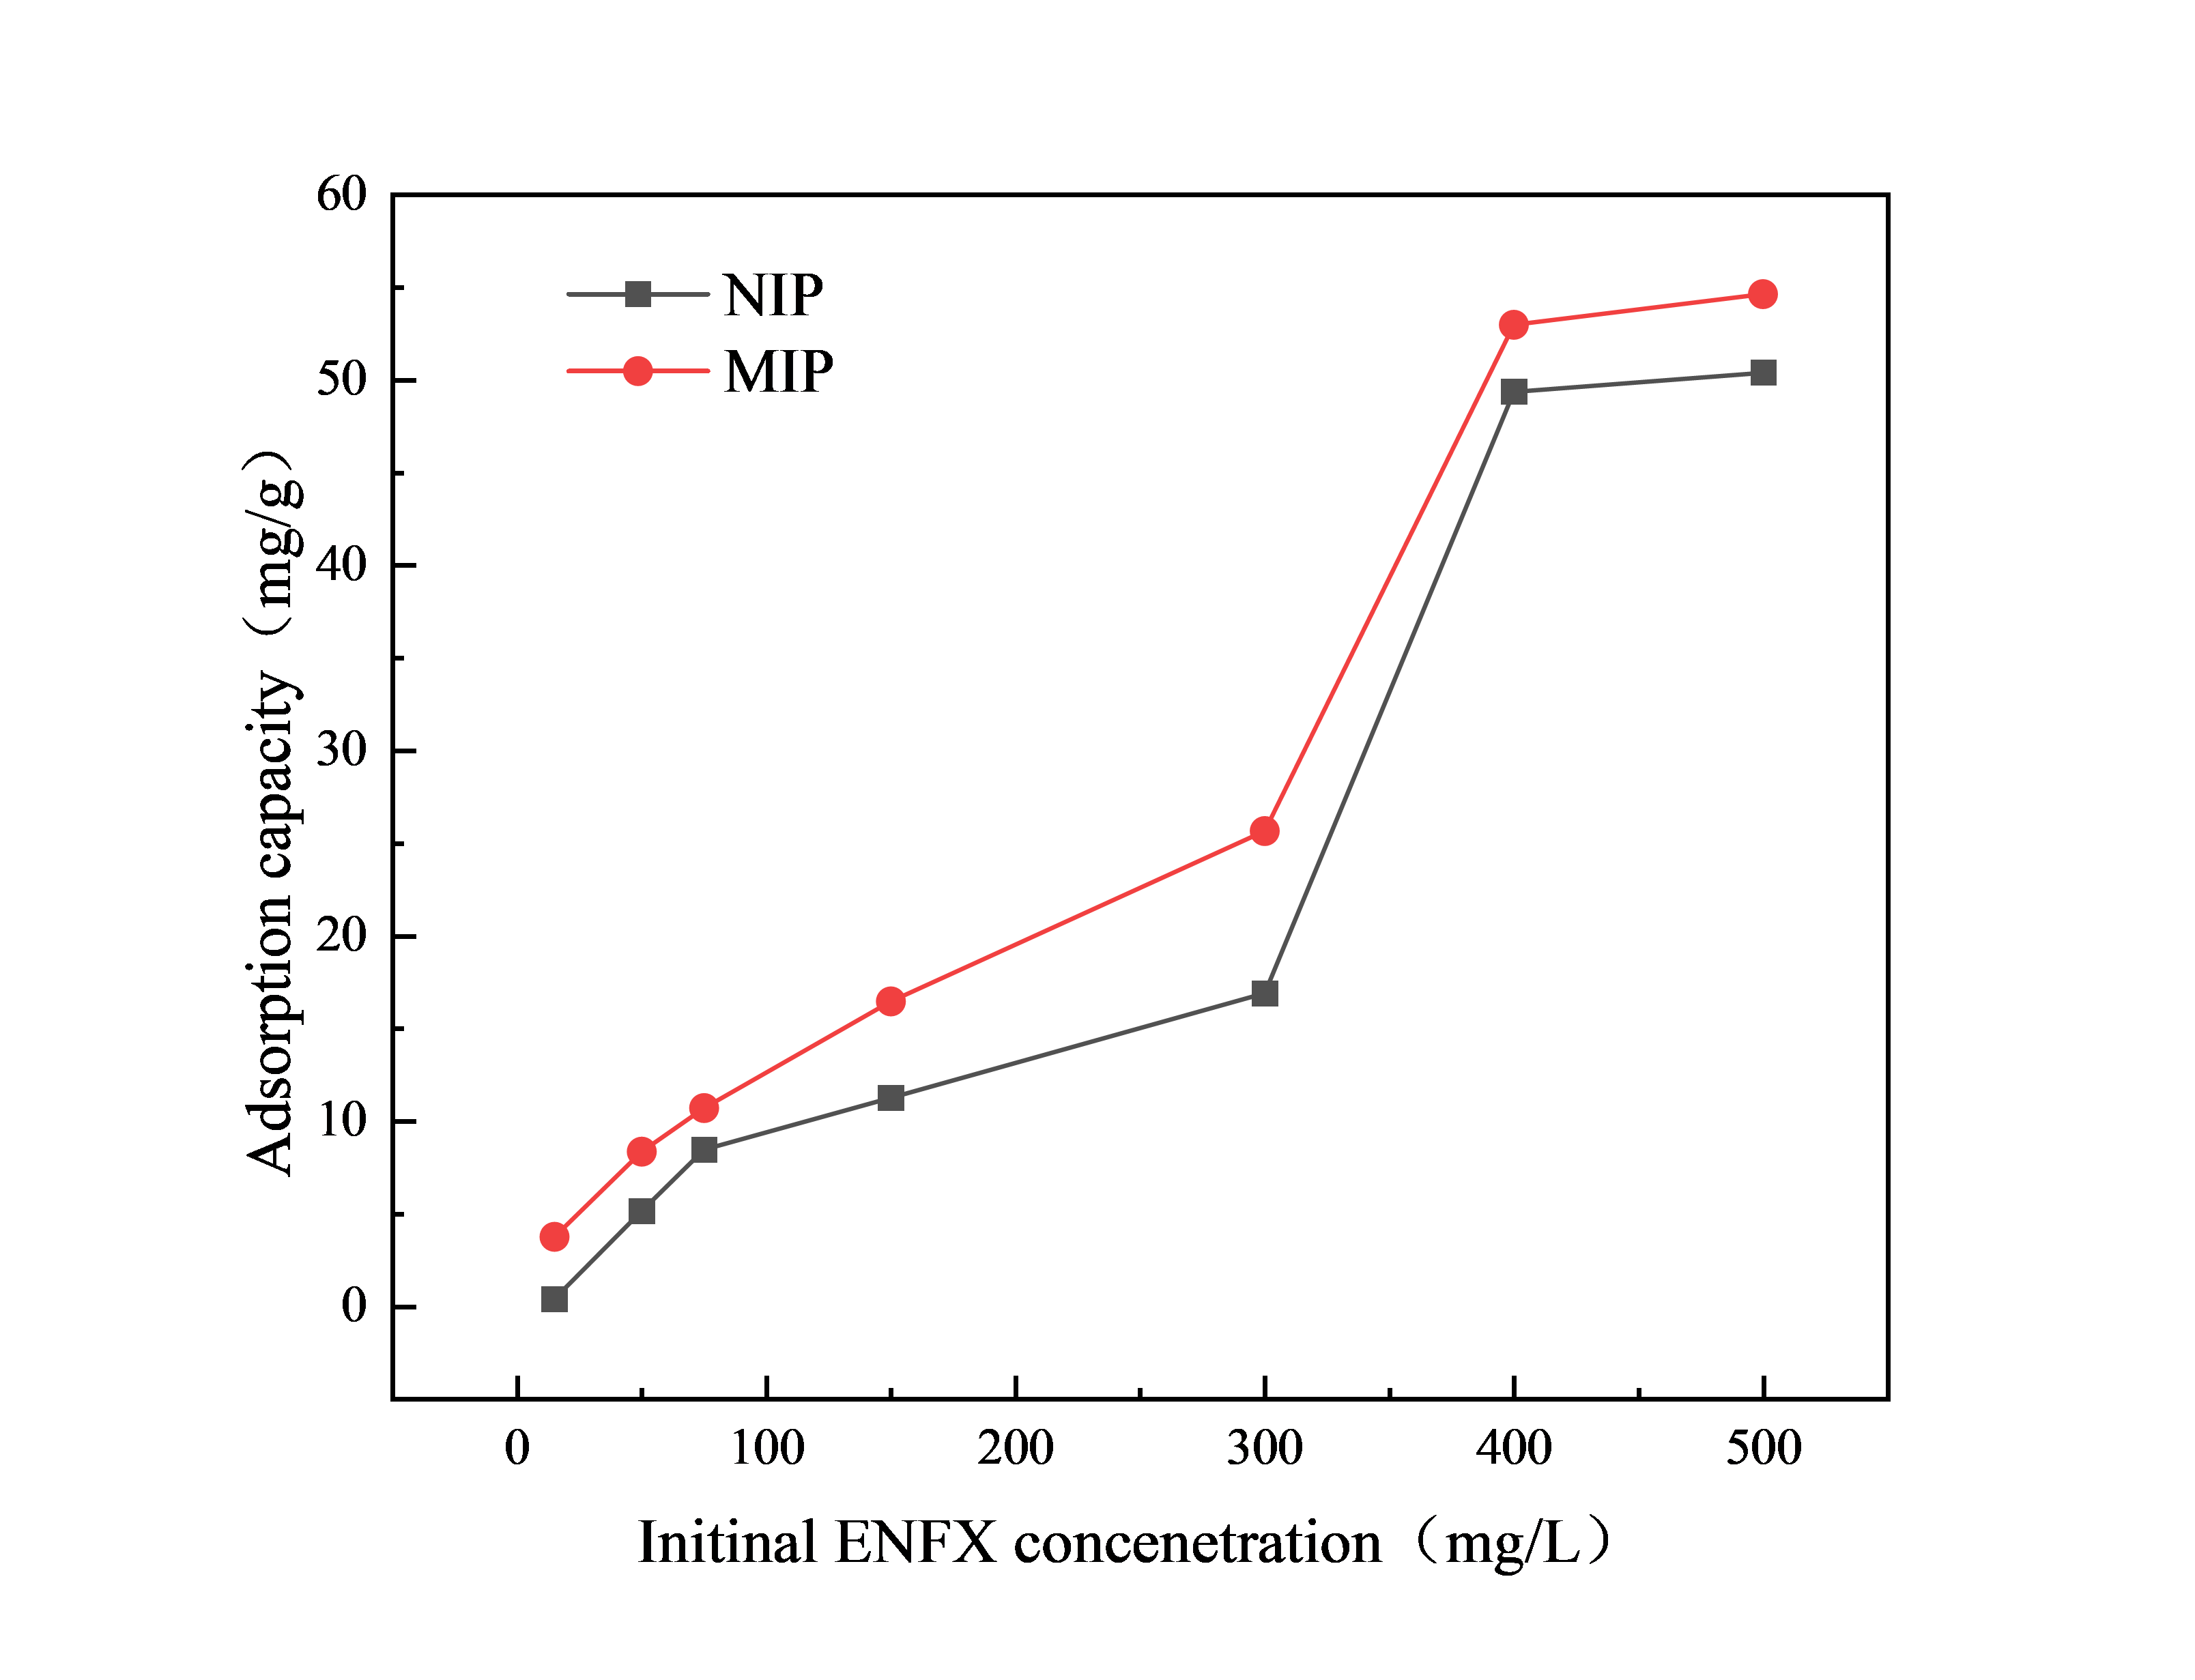


**Fig S5.** Static adsorption curves of MIP and NIP on different concentrations of ENFX (0, 50, 75, 150, 300, 400, 500 mg/L) in 1h


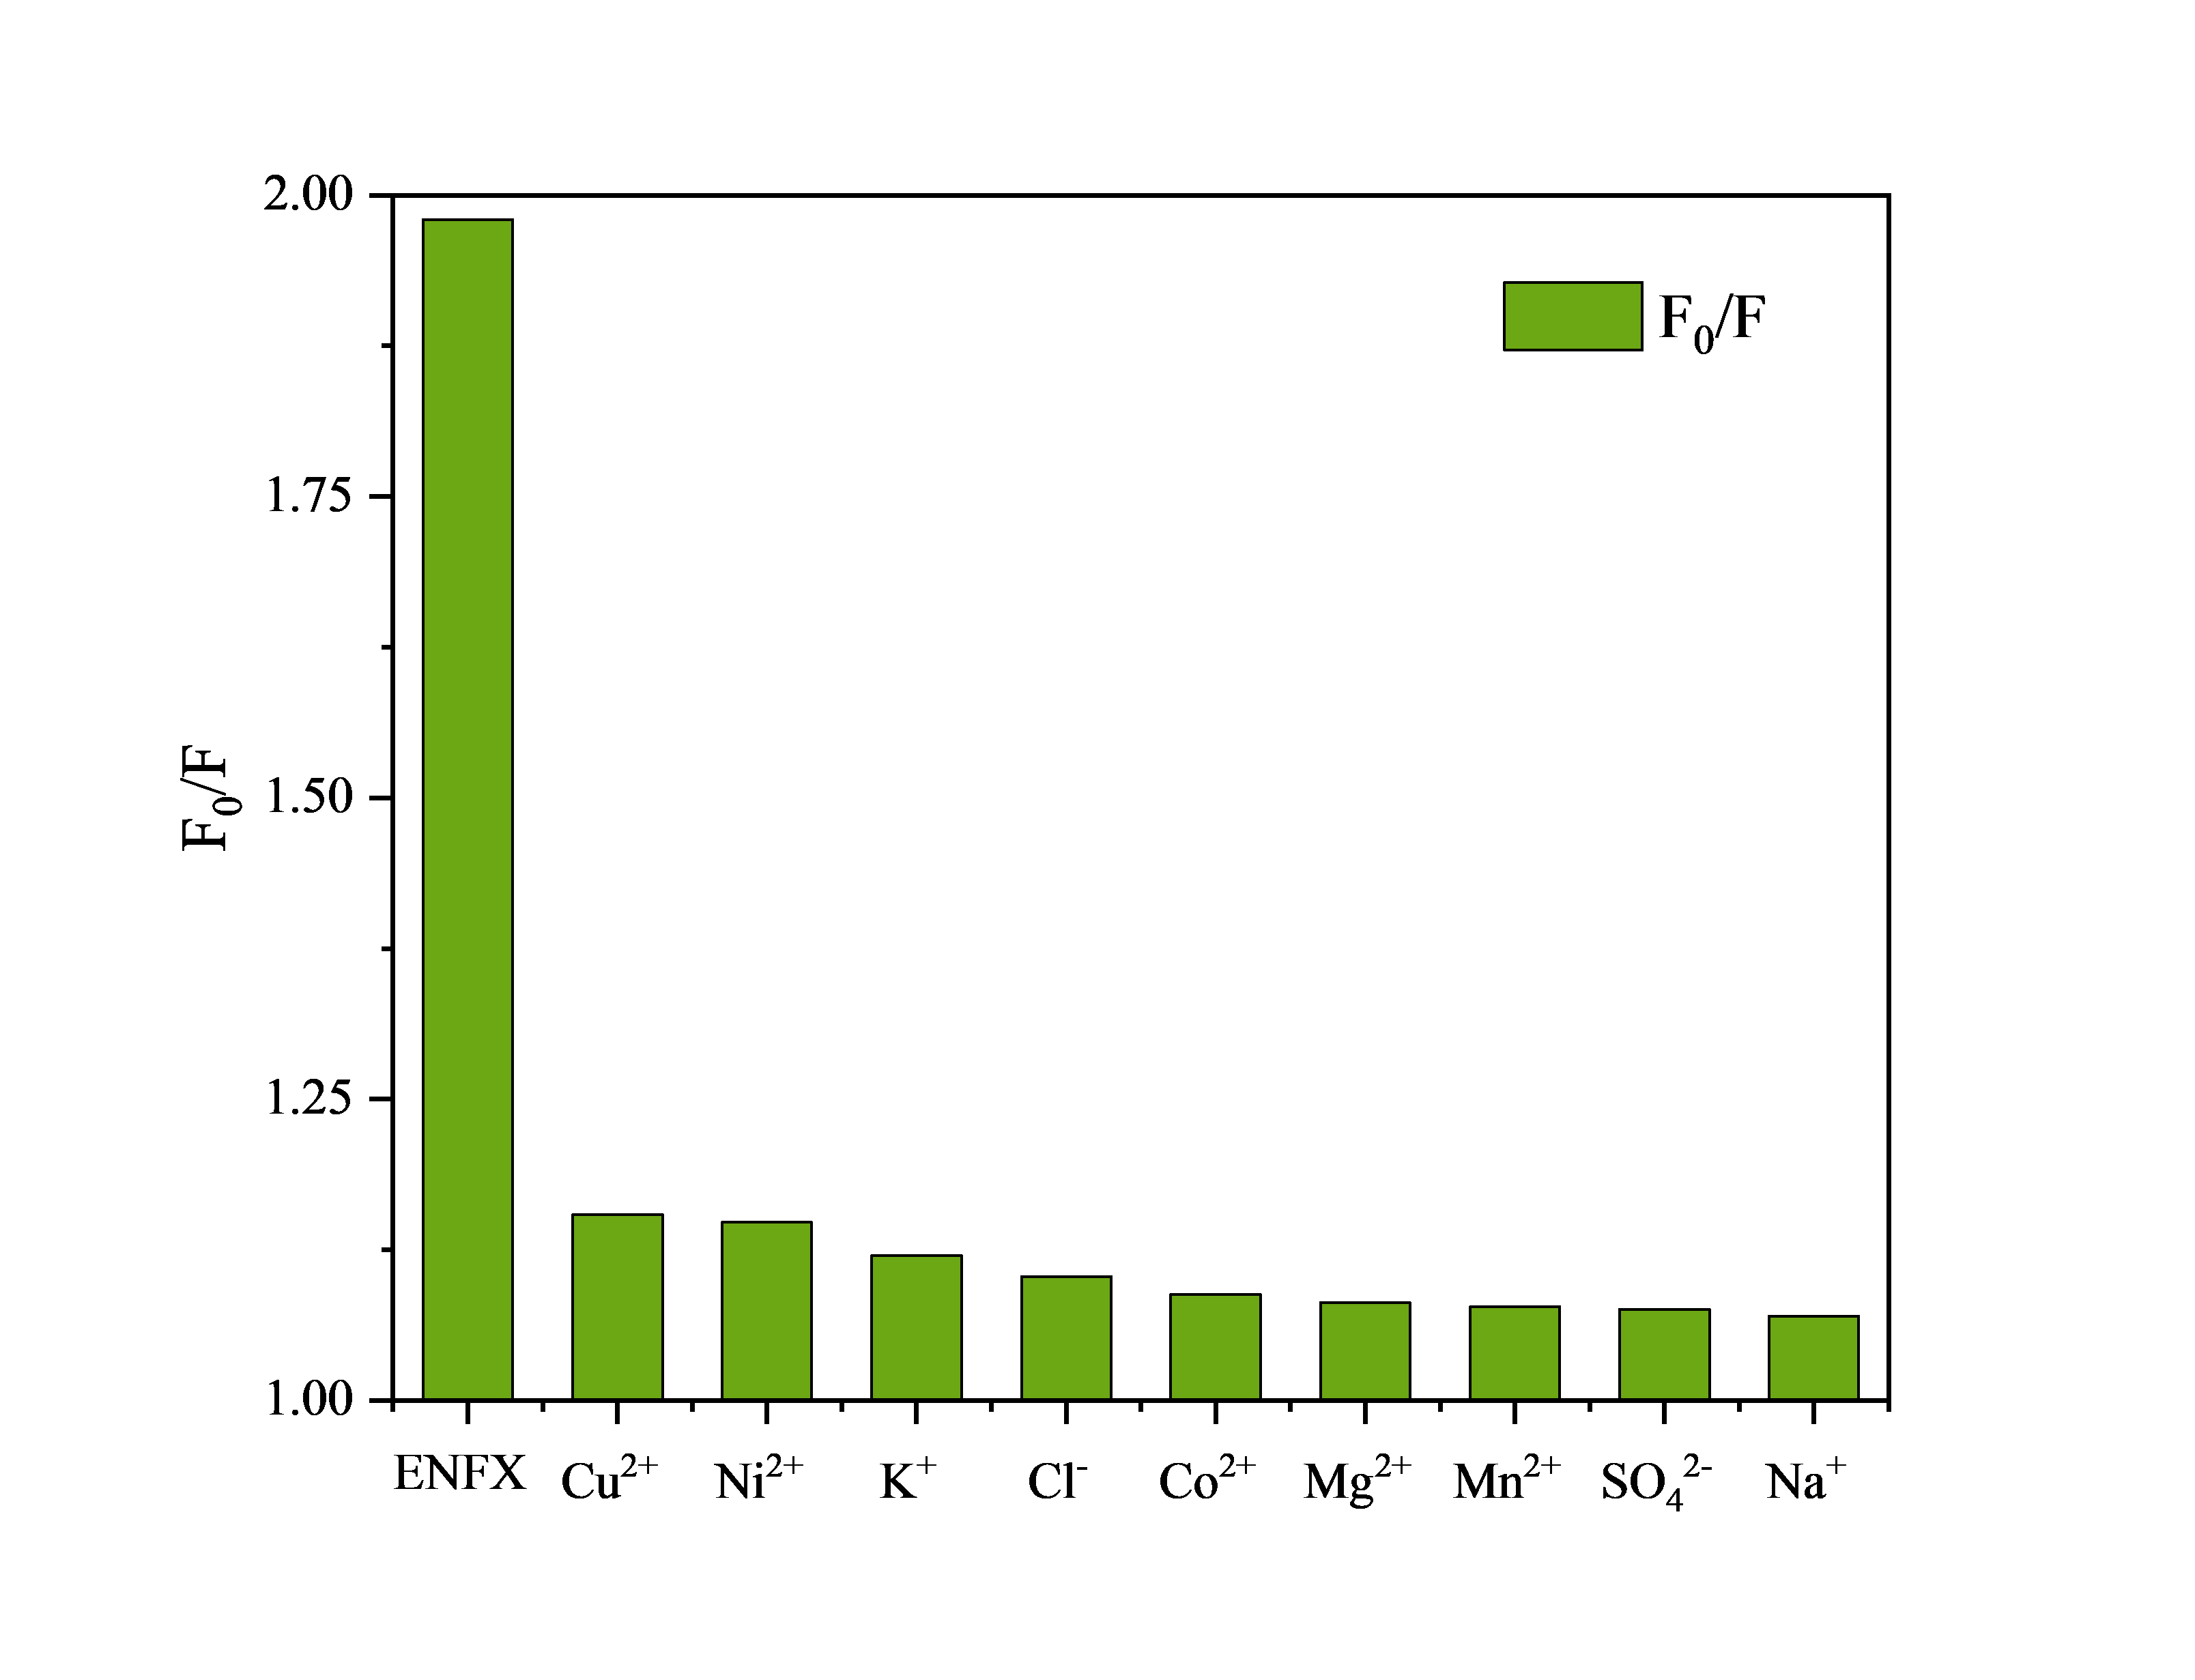


**Fig S6.** Ion immunity detection for MIP

Table S1 Detection of ENFX content in real samples using the probe.

| Sample | Spiked concentration  (μmol/L) | Detectable limit  (μmol/L) | Recovery rate  (%) | RSD  (%) |
| --- | --- | --- | --- | --- |
| Milk | 5 | 5.81 | 116.18% | 1.03% |
| 10 | 10.53 | 105.31% | 1.36% |
| 25 | 24.35 | 97.40% | 1.01% |
| 50 | 47.32 | 94.64% | 1.27% |
| 80 | 79.29 | 99.11% | 0.89% |
| 100 | 96.35 | 96.35% | 0.83% |
| Drinking water | 5 | 5.22 | 104.4% | 0.97% |
| 10 | 10.16 | 101.6% | 1.03% |
| 25 | 25.59 | 102.36% | 1.16% |
| 50 | 48.59 | 97.18% | 0.99% |
| 80 | 79.48 | 99.35% | 1.06% | |
| 100 | 96.96 | 96.96% | 1.05% | |
